# Supplementary material for: Comparison of mindful and slow eating strategies on acute energy intake
Source: PubMed Central journal article supplement — Obes Sci Pract. 2020 Aug 27;6(6):668–76. doi: 10.1002/osp4.441 (PMC7746965; doi:10.1002/osp4.441), 2020-08-27
Supplement: OSP4-6-668-s001.pdf [file OSP4-6-668-s001.pdf]

**Table 1. Condition differences in energy served between test meal sessions**

|                             | <b>All groups<br/>(n = 24)</b> | <b>EAT<br/>(n = 8)</b> | <b>MIND<br/>(n = 8)</b> | <b>SLOW<br/>(n = 8)</b> | <b>Condition</b> | <b>Time</b> | <b>Condition X Time</b> |
|-----------------------------|--------------------------------|------------------------|-------------------------|-------------------------|------------------|-------------|-------------------------|
| <b>Energy Served (kcal)</b> |                                |                        |                         |                         | 0.094            | 0.130       | 0.812                   |
| Test Meal Session 1         | 1353<br>(1323, 1378)           | 1363<br>(1326, 1381)   | 1340<br>(1303, 1355)    | 1363<br>(1329, 1378)    |                  |             |                         |
| Test Meal Session 2         | 1345<br>(1326, 1356)           | 1356<br>(1331, 1367)   | 1324<br>(1302, 1344)    | 1352<br>(1332, 1355)    |                  |             |                         |

\*All data presented as Median (25<sup>th</sup>, 75<sup>th</sup> percentile)

\*\*p-values are based on analysis of log-transformed data

**Table 2. Condition differences in energy intake between test meal sessions**

|                             | <b>All groups<br/>(n = 24)</b> | <b>EAT<br/>(n = 8)</b> | <b>MIND<br/>(n = 8)</b> | <b>SLOW<br/>(n = 8)</b> | <b>Condition</b> | <b>Time</b> | <b>Condition X Time</b> |
|-----------------------------|--------------------------------|------------------------|-------------------------|-------------------------|------------------|-------------|-------------------------|
| <b>Energy Intake (kcal)</b> |                                |                        |                         |                         | 0.786            | 0.705       | 0.133                   |
| Test Meal Session 1         | 778<br>(617, 958)              | 785<br>(503, 953)      | 772<br>(550, 945)       | 738<br>(627, 1010)      |                  |             |                         |
| Test Meal Session 2         | 763<br>(627, 964)              | 848<br>(704, 1071)     | 673<br>(485, 846)       | 756<br>(611, 1076)      |                  |             |                         |

\*All data presented as Median (25<sup>th</sup>, 75<sup>th</sup> percentile)

**Table 3. Condition differences in meal duration between test meal sessions**

|                            | All groups (n = 24) | EAT (n = 8)       | MIND (n = 8)        | SLOW (n = 8)         | Condition | Time         | Condition X Time |
|----------------------------|---------------------|-------------------|---------------------|----------------------|-----------|--------------|------------------|
| <b>Eating Time (min)**</b> |                     |                   |                     |                      | 0.094     | <b>0.004</b> | <b>0.019</b>     |
| Test Meal Session 1        | 8.8<br>(7.5, 12.3)  | 7.7<br>(7.0, 8.4) | 11.0<br>(7.8, 16.1) | 9.1<br>(8.1, 12.2)   |           |              |                  |
| Test Meal Session 2        | 10.4<br>(8.0, 13.3) | 8.1<br>(6.5, 9.6) | 11.2<br>(8.3, 17.7) | 12.3<br>(10.7, 18.7) |           |              |                  |

\*All data presented as Median (25<sup>th</sup>, 75<sup>th</sup> percentile)

\*\*p-values are based on analysis of log-transformed data

**Table 4. Condition differences in subjective ratings of hunger between test meal sessions**

|                     | All groups (n = 24) | EAT (n = 8)       | MIND (n = 8)      | SLOW (n = 8)      | Condition | Time              | Condition X Time |
|---------------------|---------------------|-------------------|-------------------|-------------------|-----------|-------------------|------------------|
| <b>Hunger</b>       |                     |                   |                   |                   | 0.571     | <<br><b>0.001</b> | 0.209            |
| Test Meal Session 1 | 2.0<br>(1.0, 2.0)   | 1.5<br>(1.0, 2.0) | 2.0<br>(1.3, 2.0) | 2.0<br>(1.0, 2.0) |           |                   |                  |
| Test Meal Session 2 | 1.0<br>(0.0, 1.0)   | 1.0<br>(0.3, 1.8) | 1.0<br>(1.3, 2.0) | 0.5<br>(0.0, 1.0) |           |                   |                  |

\*All data represented at Median (25<sup>th</sup>, 75<sup>th</sup> percentile)

**Table 5. Condition differences in subjective ratings of satiety between test meal sessions**

|                     | All groups (n = 24) | EAT (n = 8)       | MIND (n = 8)      | SLOW (n = 8)      | Condition | Time  | Condition X Time |
|---------------------|---------------------|-------------------|-------------------|-------------------|-----------|-------|------------------|
| <b>Satiety</b>      |                     |                   |                   |                   | 0.732     | 0.742 | 0.258            |
| Test Meal Session 1 | 4.0<br>(4.0, 4.0)   | 4.0<br>(4.0, 4.0) | 4.0<br>(3.3, 4.8) | 4.0<br>(4.0, 4.8) |           |       |                  |
| Test Meal Session 2 | 4.0<br>(4.0, 4.0)   | 4.0<br>(4.0, 5.0) | 4.0<br>(4.0, 4.0) | 4.0<br>(4.0, 4.0) |           |       |                  |

\*All data represented at Median (25<sup>th</sup>, 75<sup>th</sup> percentile)

**Table 6. Difference in energy intake between test meal sessions by subject and condition**

| <b>Subject 1</b> | <b>Mean Difference* In Energy Intake (kcal)</b> | <b>Condition</b> |
|------------------|-------------------------------------------------|------------------|
| 1                | -451                                            | MIND             |
| 2                | -190                                            | MIND             |
| 3                | -102                                            | EAT              |
| 4                | -98                                             | EAT              |
| 5                | -80                                             | EAT              |
| 6                | -74                                             | SLOW             |
| 7                | -62                                             | EAT              |
| 8                | -37                                             | SLOW             |
| 9                | -36                                             | SLOW             |
| 10               | -17                                             | MIND             |
| 11               | -1                                              | MIND             |
| 12               | 3                                               | SLOW             |
| 13               | 4                                               | MIND             |
| 14               | 33                                              | SLOW             |
| 15               | 41                                              | EAT              |
| 16               | 44                                              | EAT              |
| 17               | 52                                              | SLOW             |
| 18               | 60                                              | SLOW             |
| 19               | 69                                              | EAT              |
| 20               | 76                                              | MIND             |
| 21               | 158                                             | EAT              |
| 22               | 179                                             | SLOW             |
| 23               | 338                                             | MIND             |
| 24               | 382                                             | MIND             |

\*Difference was calculated as the energy intake for test meal session 2 minus the energy intake from test meal session 1. A positive number indicates energy intake was higher following the second test meal session to the first test meal session.

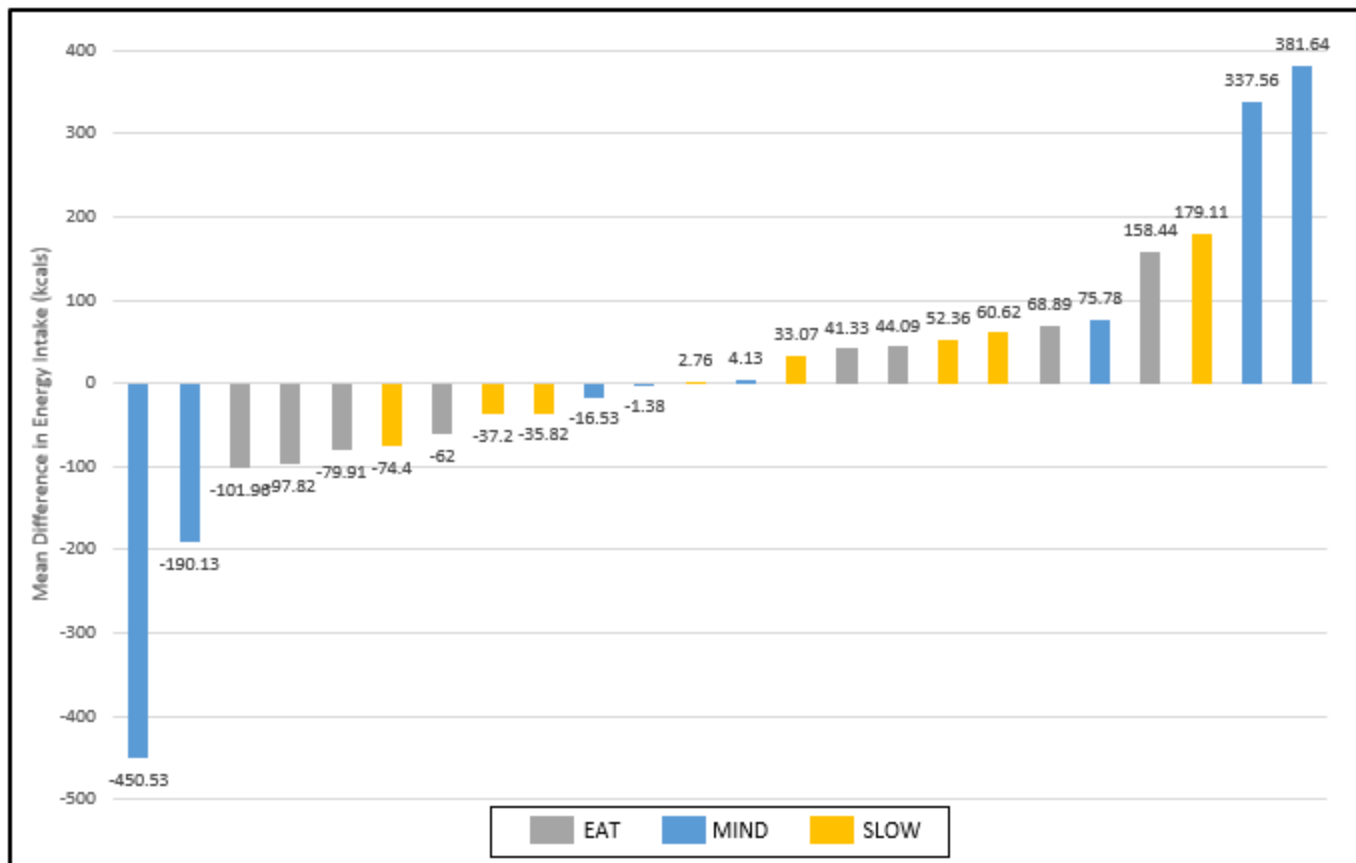

\*Difference was calculated as the energy intake for test meal session 2 minus the energy intake from test meal session 1. A positive number indicates energy intake was higher following the second test meal session to the first test meal session.

**Figure 1. Mean difference\* in energy intake between test meal sessions among subjects**
